# Supplementary material
Source: PubMed Central journal article supplement (PMC8650067)
Supplement: NIHMS1754896-supplement-Fig__S1.pdf [file NIHMS1754896-supplement-Fig__S1.pdf]

Supplementary Fig 1.

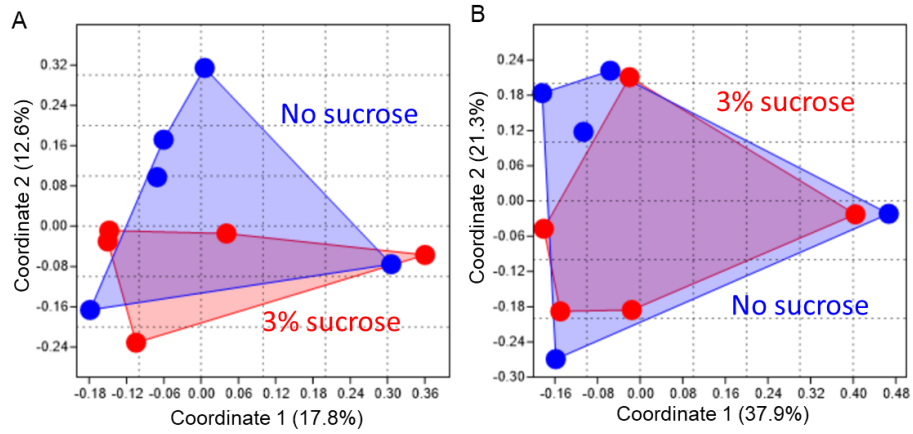

Figure S1. Principal coordinate analyses of the microbial  $\beta$ -diversity indices Jaccard (A) and Bray-Curtis (B) in mice treated with 0% (no sucrose) or 3% sucrose in their drinking water for 21 days. N = 5
